# Supplementary material for: Acetate and glycerol are not uniquely suited for the evolution of cross-feeding in E. coli
Source: PubMed Central journal article supplement (PMC7728234; doi:10.1371/journal.pcbi.1008433), 2020-11-30
Supplement: pcbi.1008433.s011.pdf [file pcbi.1008433.s011.pdf]

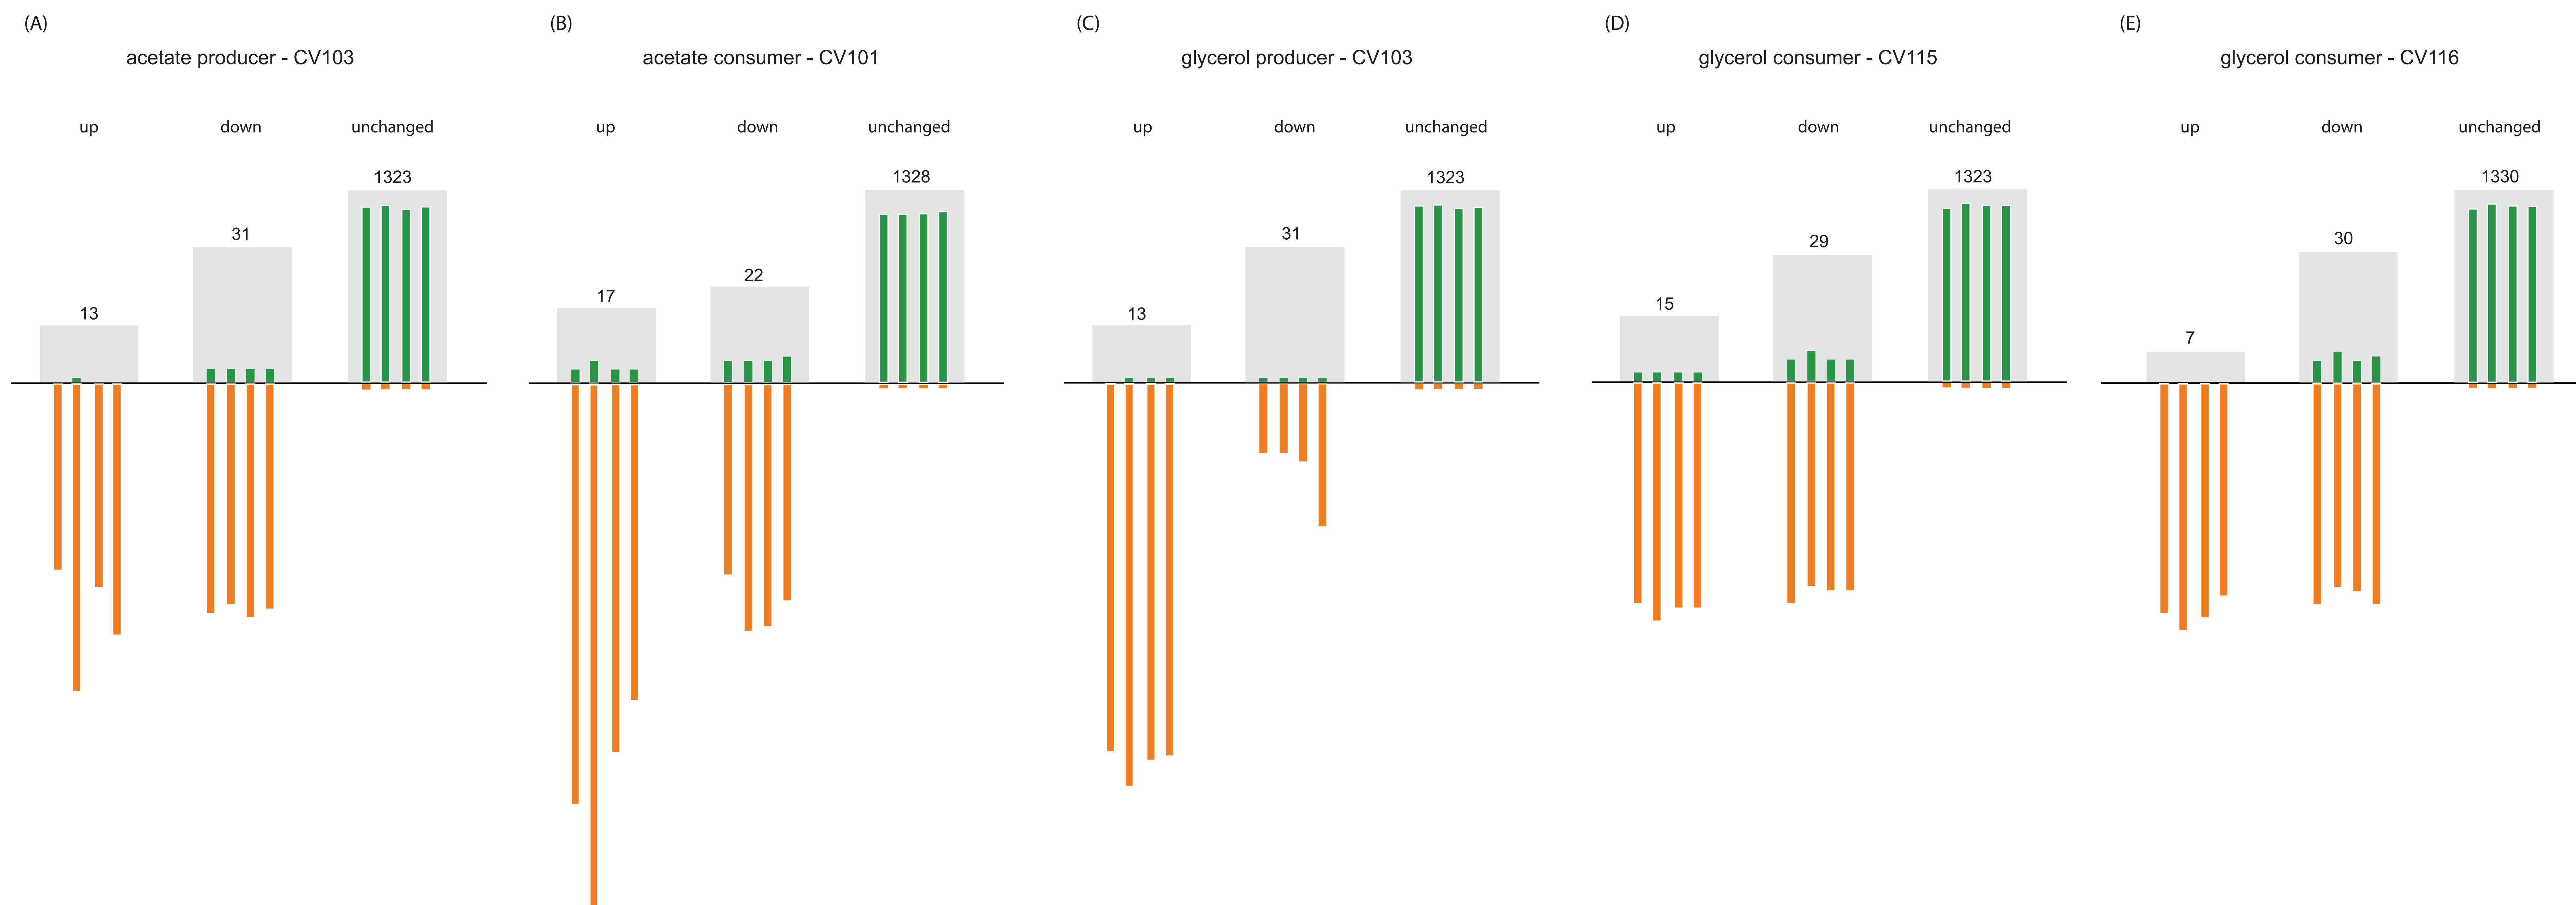

(F)

|                           | up-regulated |            |         |         | down-regulated |            |            |            | unchanged     |               |               |               |
|---------------------------|--------------|------------|---------|---------|----------------|------------|------------|------------|---------------|---------------|---------------|---------------|
|                           | RoM          | MoMA       | subsets | RoM-het | RoM            | MoMA       | subsets    | RoM-het    | RoM           | MoMA          | subsets       | RoM-het       |
| acetate producer - CV103  | 0/43         | 1/71       | 0/47    | 0/58    | 3/53           | 3/51       | 3/54       | 3/52       | 1212/39       | 1223/37       | 1196/36       | 1213/38       |
| acetate consumer - CV101  | 3/97         | *<br>5/121 | 3/85    | 3/73    | **<br>5/44     | **<br>5/57 | **<br>5/56 | **<br>6/50 | **<br>1164/27 | **<br>1165/25 | 1167/38       | **<br>1182/28 |
| glycerol producer - CV103 | 0/85         | 1/93       | 1/87    | 1/86    | 1/16           | 1/16       | 1/18       | 1/33       | 1219/39       | 1226/37       | 1201/37       | *<br>1210/36  |
| glycerol consumer - CV115 | 2/51         | 2/55       | 2/52    | 2/47    | **<br>5/51     | **<br>7/47 | **<br>5/48 | **<br>7/50 | **<br>1195/32 | **<br>1230/33 | **<br>1215/34 | **<br>1212/32 |
| glycerol consumer - CV116 | 0/53         | 0/57       | 0/54    | 9/49    | **<br>5/51     | **<br>7/47 | **<br>5/48 | **<br>6/51 | **<br>1200/27 | **<br>1235/28 | **<br>1221/28 | **<br>1217/27 |
