# Supplementary material for: Acetate and glycerol are not uniquely suited for the evolution of cross-feeding in E. coli
Source: PubMed Central journal article supplement (PMC7728234; doi:10.1371/journal.pcbi.1008433), 2020-11-30

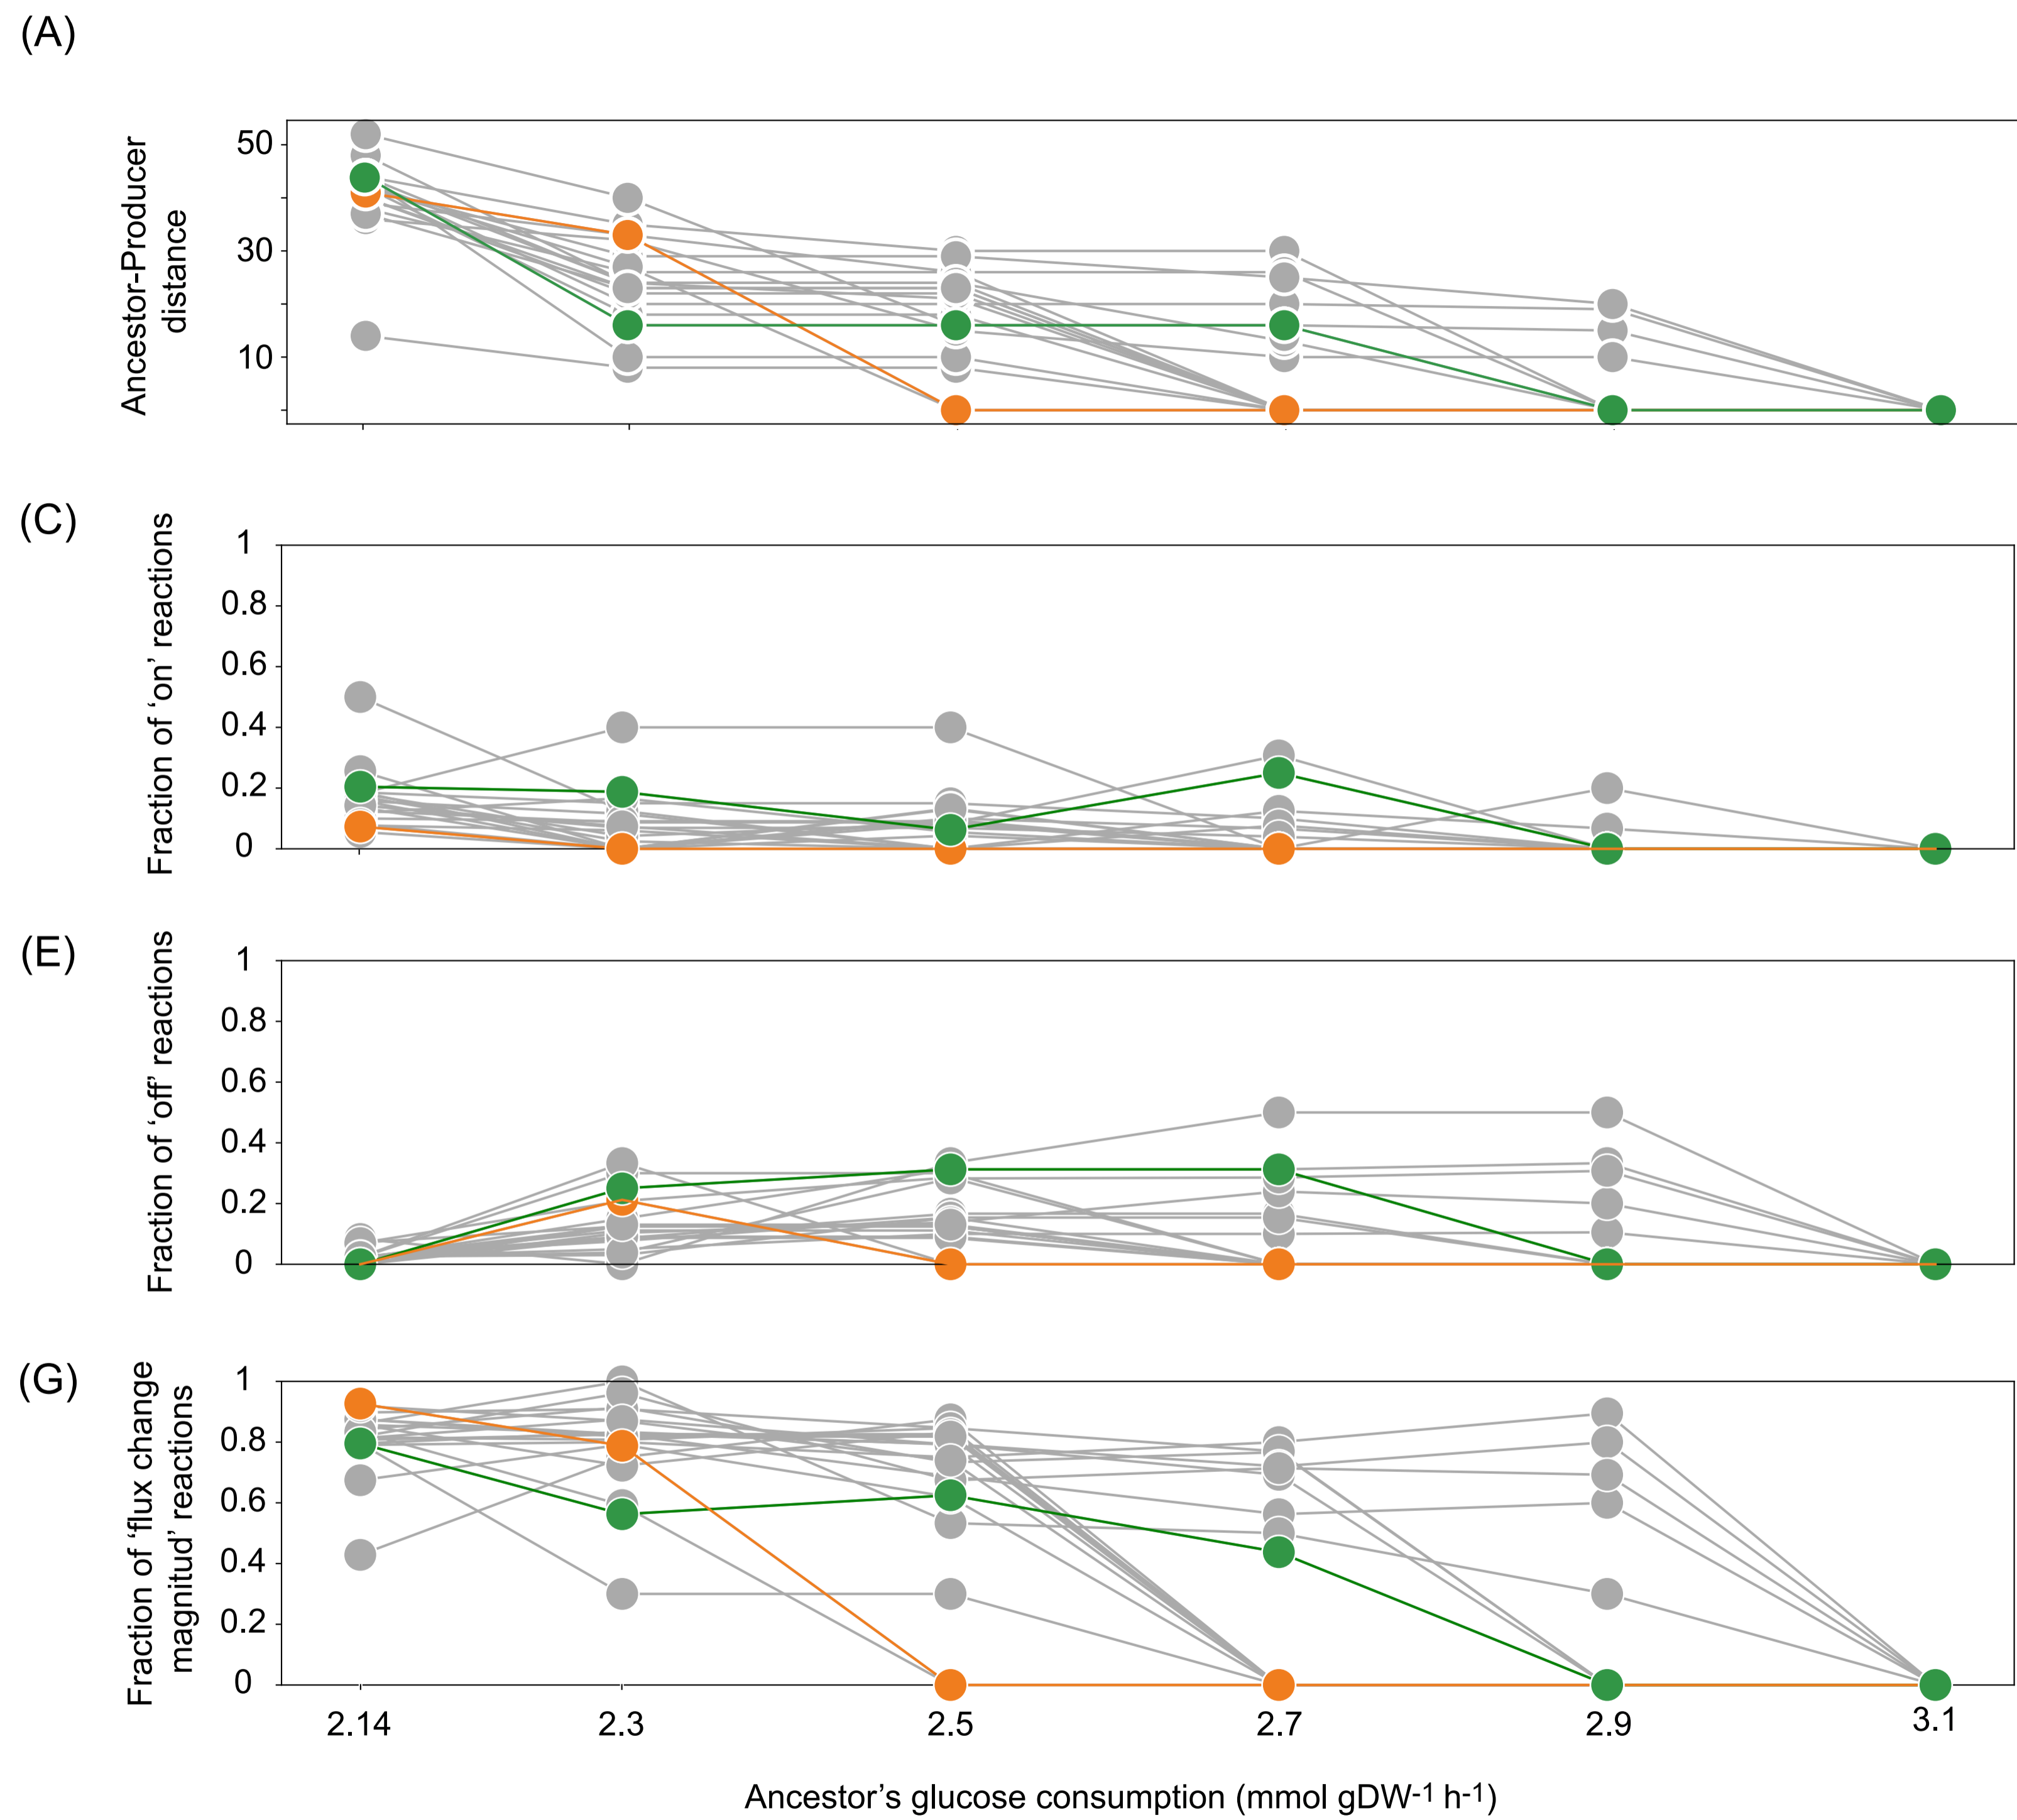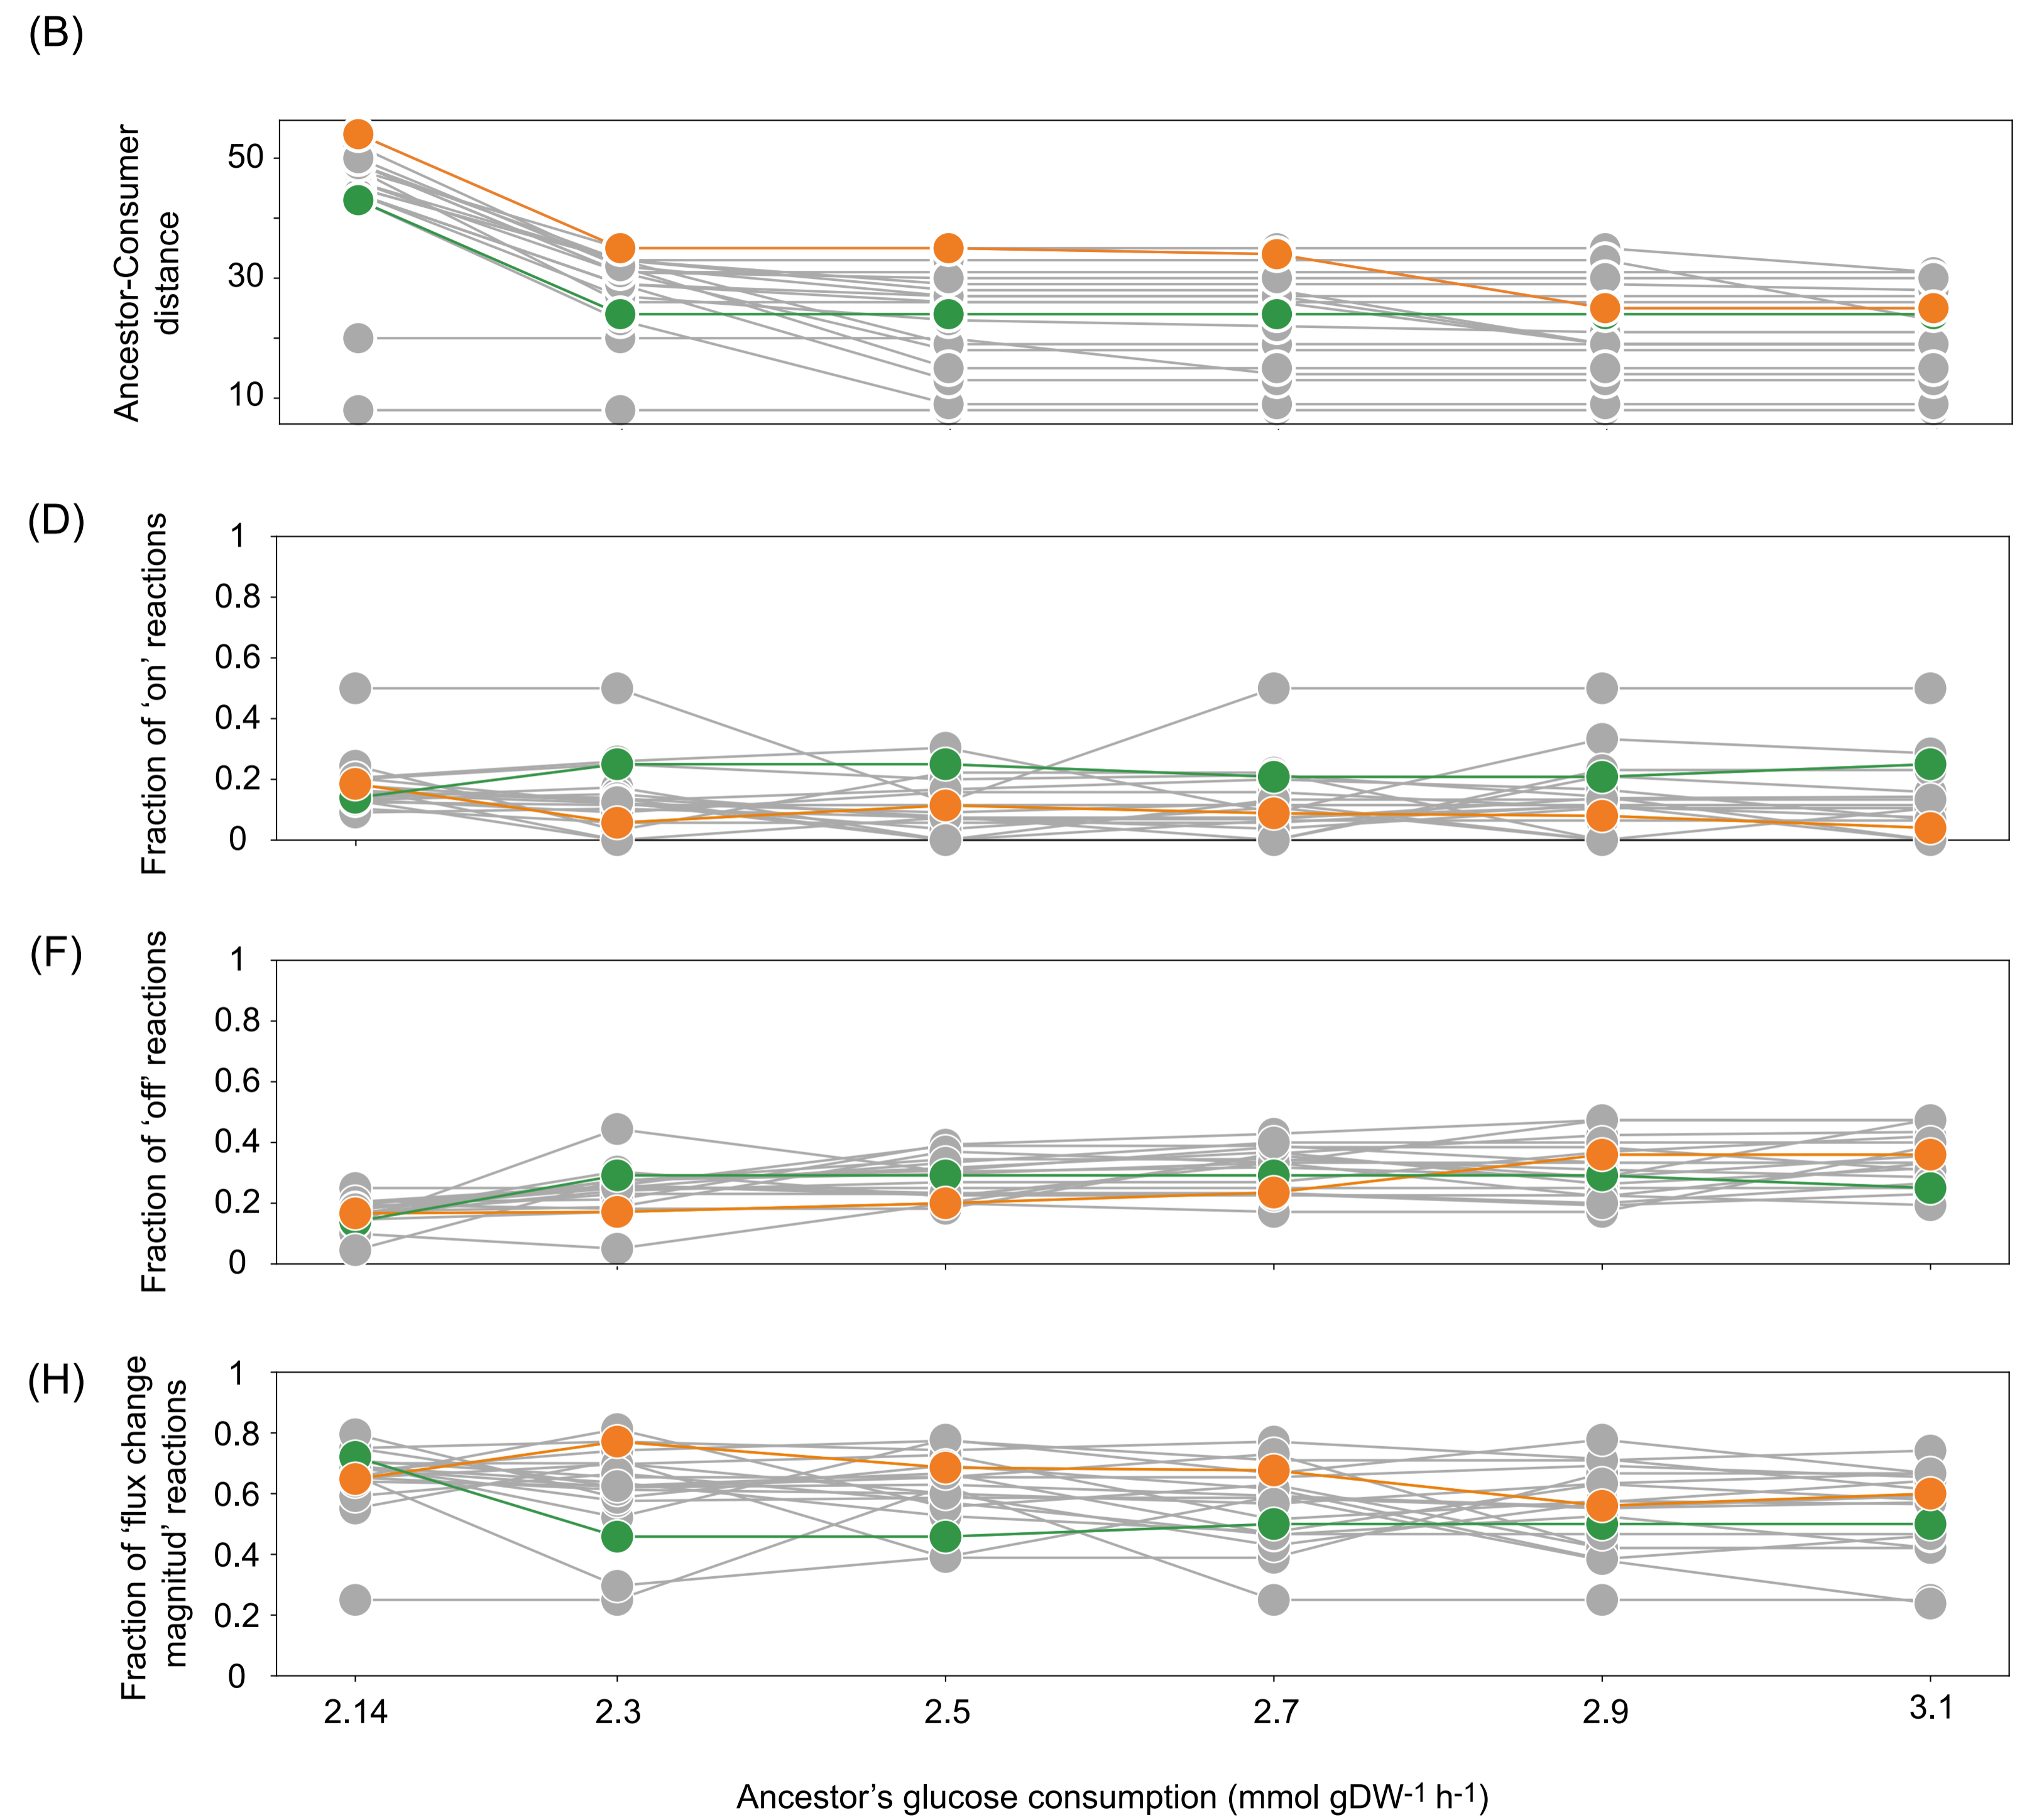

Supplement: pcbi.1008433.s015.pdf [file pcbi.1008433.s015.pdf]
